# Supplementary material for: Detection of Feline Coronavirus Variants in Cats without Feline Infectious Peritonitis
Source: MDPI journal article supplement (doi:10.3390/v14081671), 2022-07-29
Supplement: s1 [file s1]

**Table S1.** Cats without feline infectious peritonitis (FIP) included in the study.

| Cat | Breed              | Sex             | Age                       | Pathological findings                                     |
|-----|--------------------|-----------------|---------------------------|-----------------------------------------------------------|
| 1   | Domestic Shorthair | Female neutered | 16 years                  | Myocarditis, endocardial fibrosis, interstitial pneumonia |
| 2   | British Shorthair  | Male neutered   | 13 years                  | HCM, thrombosis of multiple vessels, end stage CKD        |
| 3   | Maine Coon         | Male neutered   | 1 year                    | Internal hydrocephalus, aqueduct stenosis                 |
| 4   | Birman             | Female neutered | 14 years                  | Lymphoma of larynx, trachea, and bone marrow              |
| 5   | Domestic Shorthair | Male neutered   | Adult (exact age unknown) | Parvovirus                                                |
| 6   | Domestic Shorthair | Male neutered   | 18 years                  | Mast cell tumor in liver, spleen, and intestines          |
| 7   | Domestic Shorthair | Female neutered | 13 years                  | Sepsis originating from purulent necrotizing enteritis    |
| 8   | Domestic Shorthair | Male neutered   | 13 years                  | Pulmonary adenocarcinoma, thyroid adenoma, CKD            |
| 9   | Domestic Shorthair | Male neutered   | Adult                     | Parvovirus and <i>Taenia</i> spp. infestation             |
| 10  | Domestic Shorthair | Male neutered   | 8 years                   | Lymphoma in lung, liver, kidney, spleen, and mediastinum  |
| 11  | Domestic Shorthair | Female neutered | 13 years                  | Multicentric lymphoma                                     |
| 12  | Domestic Shorthair | Male neutered   | 14 years                  | Soft tissue sarcoma of thymus, spleen, and caecum         |
| 13  | Domestic Shorthair | Female neutered | 6 years                   | CKD, chronic pyelonephritis                               |
| 14  | Domestic Shorthair | Female          | 5 months                  | Purulent pneumonia                                        |
| 15  | Domestic Shorthair | Male neutered   | Adult (exact age unknown) | HCM, aortic thrombosis                                    |
| 16  | Domestic Shorthair | Male neutered   | 4 years                   | HCM, pulmonary edema                                      |
| 17  | Sphinx             | Female neutered | 5 years                   | Purulent necrotizing pneumonia                            |
| 18  | Domestic Shorthair | Male neutered   | Adult                     | Multicentric lymphoma (liver, spleen, brain)              |

|    |                    |                 |                           |                                                                               |
|----|--------------------|-----------------|---------------------------|-------------------------------------------------------------------------------|
| 19 | Domestic Shorthair | Male neutered   | 4 years                   | Oxalate nephrosis, acute kidney injury                                        |
| 20 | Domestic Shorthair | Female neutered | 9 months                  | Diaphragmatic herniation                                                      |
| 21 | Domestic Shorthair | Male neutered   | 4 years                   | DCM, pulmonary edema                                                          |
| 22 | Domestic Shorthair | Male neutered   | Adult (exact age unknown) | Blunt trauma with crushing, fragmentation and hemorrhage of the skull         |
| 23 | Domestic Shorthair | Male neutered   | 10 years                  | Lymphoma in kidneys, intestine, and omentum                                   |
| 24 | Domestic Shorthair | Female neutered | 11 years                  | Fibrosis of the mitral valve, chronic eosinophilic bronchopneumonia           |
| 25 | Domestic Shorthair | Male neutered   | 9 years                   | Blunt trauma with rib fracture and exit of the heart                          |
| 26 | Domestic Shorthair | Female neutered | 15 years                  | Bronchoalveolar carcinoma                                                     |
| 27 | Domestic Shorthair | Female neutered | 10 years                  | Lymphoma in intestine, pancreas, mesenteric lymph nodes, kidneys, and omentum |
| 28 | Domestic Shorthair | Female neutered | 16 years                  | Hepatic cystadenoma, peritonitis, perihepatitis                               |
| 29 | Domestic Shorthair | Male neutered   | 8 years                   | Pneumonia                                                                     |
| 30 | Domestic Shorthair | Male neutered   | Adult (exact age unknown) | Purulent bronchopneumonia and interstitial pneumonia                          |
| 31 | Domestic Shorthair | Female neutered | 18 years                  | Thrombosis of the pulmonary vessels, necrotizing hepatitis                    |
| 32 | Maine Coon         | Female neutered | 13 years                  | Parvovirus, intussusception                                                   |
| 33 | Domestic Shorthair | Male neutered   | 6 months                  | Hepatic necrosis and associated bleeding tendency                             |
| 34 | Domestic Shorthair | Female neutered | 12 years                  | HCM, pulmonary edema                                                          |
| 35 | Domestic Shorthair | Male neutered   | 14 years                  | Brain tumor, endomyocardial fibrosis                                          |
| 36 | Domestic Shorthair | Male neutered   | 11 years                  | RCM, secondary pulmonary edema                                                |
| 37 | Domestic Shorthair | Female neutered | Adult (exact age unknown) | Myocarditis, pulmonary edema                                                  |

|    |                    |                 |                           |                                                                                                                                                                                            |
|----|--------------------|-----------------|---------------------------|--------------------------------------------------------------------------------------------------------------------------------------------------------------------------------------------|
| 38 | Domestic Shorthair | Male neutered   | 16 years                  | Ruptured hepatocellular adenoma, interstitial pneumonia, CKD                                                                                                                               |
| 39 | Not documented     | Not documented  | Adult (exact age unknown) | Multimorbidity                                                                                                                                                                             |
| 40 | Domestic Shorthair | Female neutered | 13 years                  | Urolithiasis, end stage CKD                                                                                                                                                                |
| 41 | Domestic Shorthair | Male neutered   | 16 years                  | Thyroid adenoma, secondary changes in the liver (vacuolar degeneration, hepatocellular necrosis), kidneys (interstitial lymphoplasmacytic infiltration), and heart (interstitial fibrosis) |
| 42 | Domestic Shorthair | Male neutered   | 10 years                  | Adenocarcinoma of the lung with metastasis to various organs                                                                                                                               |
| 43 | Domestic Shorthair | Female neutered | 9 years                   | Thrombosis of numerous pulmonary vessels                                                                                                                                                   |
| 44 | Domestic Shorthair | Male neutered   | 8 years                   | HCM                                                                                                                                                                                        |
| 45 | Domestic Shorthair | Male neutered   | 5 years                   | Vermious pneumonia, chronic enteritis, chronic interstitial nephritis                                                                                                                      |
| 46 | Domestic Shorthair | Male neutered   | 12 years                  | Multicentric lymphoma                                                                                                                                                                      |
| 47 | Domestic Shorthair | Female neutered | 7 years                   | Hepatic lipidosis                                                                                                                                                                          |
| 48 | Domestic Shorthair | Male neutered   | 16 years                  | Adenocarcinoma of lung and pleura                                                                                                                                                          |
| 49 | Domestic Shorthair | Female neutered | 17 years                  | Chronic hepatitis and cholangitis, interstitial pneumonia, CKD                                                                                                                             |
| 50 | Domestic Shorthair | Female neutered | Adult (exact age unknown) | HCM, aortic thrombosis                                                                                                                                                                     |
| 51 | Domestic Shorthair | Female neutered | 12 years                  | Trauma with extensive bleeding                                                                                                                                                             |
| 52 | British Shorthair  | Male neutered   | 10 years                  | HCM, pulmonary edema                                                                                                                                                                       |
| 53 | Domestic Shorthair | Male neutered   | 8 years                   | Myocarditis, pleuropneumonia                                                                                                                                                               |
| 54 | Domestic Shorthair | Female neutered | 14 years                  | Pulmonary adenocarcinoma                                                                                                                                                                   |
| 55 | British Shorthair  | Female          | 6 weeks                   | Volvolus                                                                                                                                                                                   |
| 56 | Domestic Shorthair | Male neutered   | 11 years                  | RCM, interstitial pneumonia                                                                                                                                                                |

|    |                      |                 |                           |                                                                               |
|----|----------------------|-----------------|---------------------------|-------------------------------------------------------------------------------|
| 57 | Domestic Shorthair   | Male neutered   | 7 months                  | <i>Cryptosporidium</i> spp. infestation, multifocal necrotizing enterocolitis |
| 58 | Domestic Shorthair   | Male neutered   | 4 years                   | HCM, pulmonary fibrosis, <i>Taenia</i> spp. infestation                       |
| 59 | Domestic Shorthair   | Female neutered | 9 years                   | Diphtheroid necrotizing enteritis, hepatic lipidosis                          |
| 60 | Domestic Shorthair   | Male neutered   | 15 years                  | RCM, pulmonary edema                                                          |
| 61 | Domestic Shorthair   | Male neutered   | 12 years                  | Lymphoma of liver, kidneys, and gastrointestinal tract                        |
| 62 | Domestic Shorthair   | Female neutered | 22 years                  | HCM, pulmonary edema                                                          |
| 63 | Domestic Shorthair   | Female neutered | 12 years                  | HCM, pulmonary edema                                                          |
| 64 | Domestic Shorthair   | Male neutered   | 20 years                  | Meningioma                                                                    |
| 65 | Domestic Shorthair   | Female neutered | 13 years                  | Multicentric lymphoma                                                         |
| 66 | Domestic Shorthair   | Female neutered | 12 years                  | Embolitic purulent nephritis                                                  |
| 67 | Domestic Shorthair   | Male neutered   | 15 years                  | Adenocarcinoma of the stomach                                                 |
| 68 | Birman Mix           | Female          | 1 year                    | Trauma with multiple hemorrhages                                              |
| 69 | Domestic Shorthair   | Male neutered   | 9 years                   | Chronic fibrosing myocarditis and concentric cardiomyopathy                   |
| 70 | Domestic Shorthair   | Male neutered   | Adult (exact age unknown) | Hemorrhagic necrotizing cystitis, chronic pyelonephritis, CKD                 |
| 71 | Norwegian Forest Cat | Female neutered | 3 years                   | RCM, interstitial pneumonia                                                   |
| 72 | Domestic Shorthair   | Female neutered | 18 years                  | Hepatocellular adenoma, myocardial fibrosis, CKD                              |
| 73 | Maine Coon           | Male neutered   | 7 years                   | HCM, pulmonary edema                                                          |
| 74 | Domestic Shorthair   | Female neutered | 12 years                  | Hydronephrosis                                                                |
| 75 | Domestic Shorthair   | Male neutered   | 10 years                  | HCM, pulmonary edema, hemorrhagic necrotizing cystitis, CKD                   |
| 76 | Domestic Shorthair   | Male neutered   | 8 years                   | Enteritis, purulent granulomatous                                             |

|    |                    |                 |                           |                                                                                               |
|----|--------------------|-----------------|---------------------------|-----------------------------------------------------------------------------------------------|
|    |                    |                 |                           | tonsillitis and laryngopharyngitis                                                            |
| 77 | Domestic Shorthair | Male neutered   | 4 years                   | Decompensated eccentric left ventricular hypertrophy, pulmonary edema                         |
| 78 | Domestic Shorthair | Female neutered | 20 years                  | Chronic enteritis                                                                             |
| 79 | Domestic Shorthair | Female neutered | 6 years                   | Meningioma                                                                                    |
| 80 | Domestic Shorthair | Male neutered   | 10 years                  | Generalized lymphoma, hemorrhagic cholecystitis and lymphoplasmacytic cholangiohepatitis      |
| 81 | Domestic Shorthair | Male neutered   | 16 years                  | Transverse fracture of the spine                                                              |
| 82 | Domestic Shorthair | Male neutered   | 18 years                  | Multicentric lymphoma                                                                         |
| 83 | Domestic Shorthair | Female neutered | Adult (exact age unknown) | Hepatolipidosis, CKD, pancreatic islet amyloidosis                                            |
| 84 | Domestic Shorthair | Male            | 3 months                  | Chronic interstitial pneumonia, pulmonary edema                                               |
| 85 | Maine Coon Mix     | Male            | 9 months                  | Trauma with serial rib fractures, laceration of abdominal wall, hemorrhage into body cavities |
| 86 | Domestic Shorthair | Male neutered   | 9 years                   | HCM, pulmonary edema                                                                          |
| 87 | British Shorthair  | Female neutered | 7 years                   | Hippocampal sclerosis                                                                         |

CKD = chronic kidney disease; DCM = dilated cardiomyopathy; HCM = hypertrophic cardiomyopathy; RCM = restrictive cardiomyopathy.
